# Supplementary material for: The imprint of erosion by glacial lake outburst floods in the topography of central Himalayan rivers
Source: Copernicus journal article supplement (doi:10.5194/esurf-10-705-2022), 2022-07-14
Supplement: Supplementary file 1 [file esurf-10-705-2022-supplement.pdf]

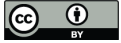

*Supplement of*

## **The imprint of erosion by glacial lake outburst floods in the topography of central Himalayan rivers**

**Maxwell P. Dahlquist and A. Joshua West**

*Correspondence to:* Maxwell P. Dahlquist ([mpdahlqu@sewanee.edu](mailto:mpdahlqu@sewanee.edu))

The copyright of individual parts of the supplement might differ from the article licence.

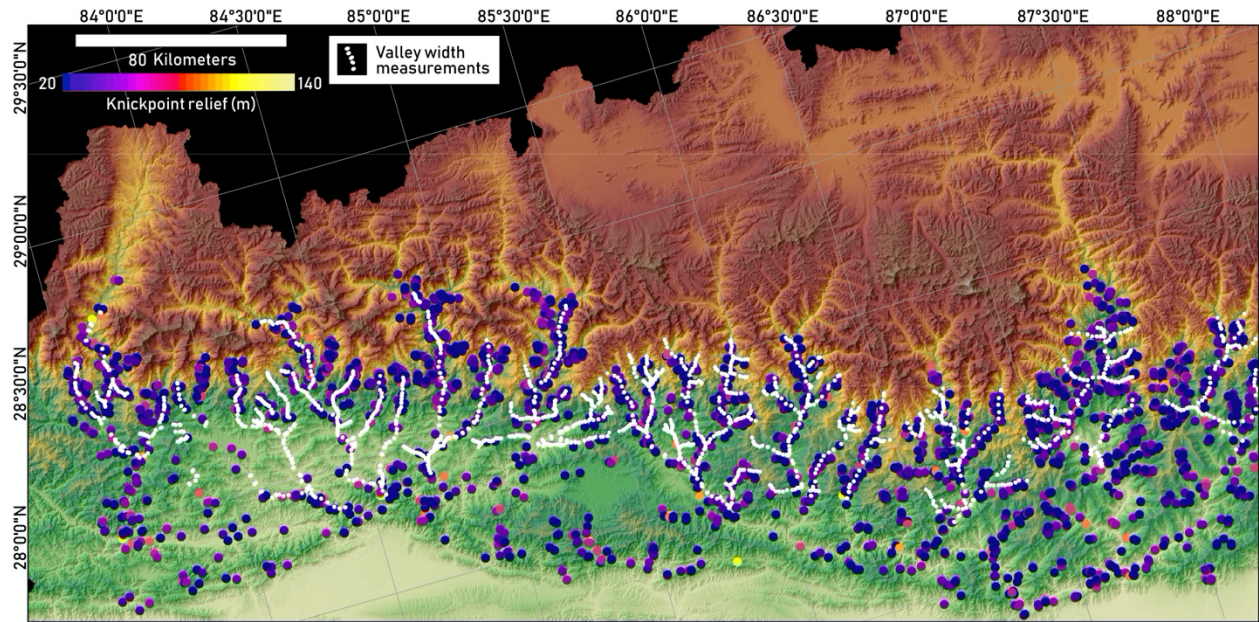

**Figure S1** Locations and relief of knickpoints included in analyses, and locations of valley width measurements.

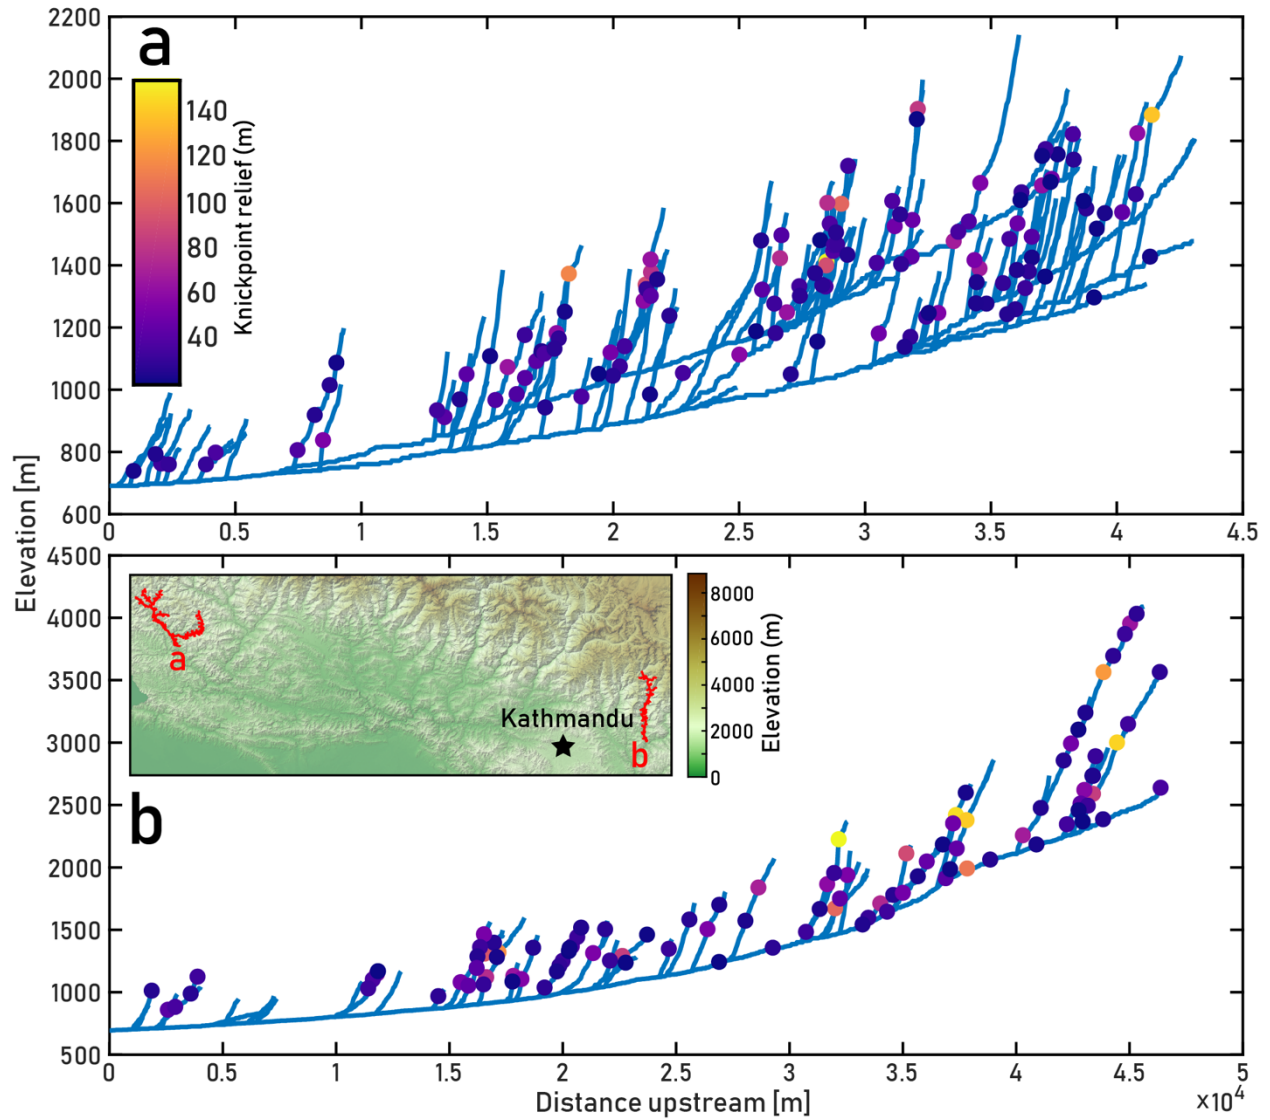

**Figure S2** (a) Long profile of upper Badhighat River network with knickpoints identified. 1<sup>st</sup> and 2<sup>nd</sup>-order tributaries are shown up to 2 km from their confluences with 3<sup>rd</sup> and 4<sup>th</sup> order trunk streams. The Badhighat River represents an entirely unglaciated watershed. Knickpoints shown were identified as described in Methods. (b) Long profile of Bhote Koshi River network shown with knickpoints. The Bhote Koshi is an example of a glaciated watershed with multiple recent GLOFs.

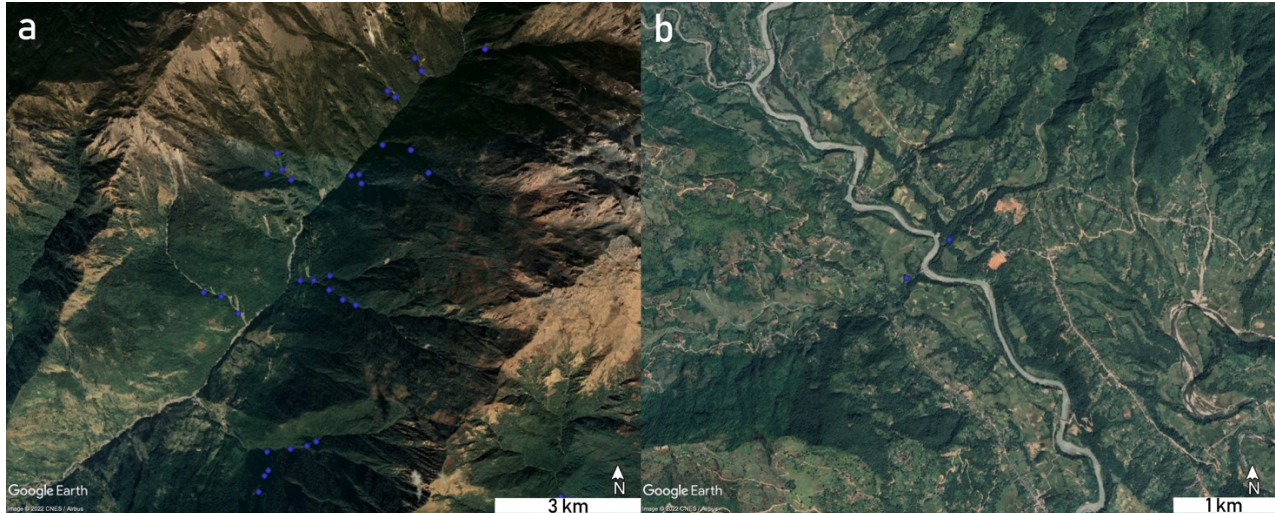

**Figure S3** (a) Google Earth photo showing knickpoint locations (blue) in narrow, upland valley. Knickpoints shown here are in bedrock, representing the vast majority of knickpoints analyzed (~98%). (b) Knickpoints in tributaries to highly alluviated

**Table 1** Uplift and erosion data for basins analysed in Section 3.4

| Sample<br>(Godard et al.,<br>2014) | Longitude | Latitude | Denudation<br>Rate (mm/yr) | Uncertainty<br>(mm/yr) | Uplift Rate<br>(Lave and<br>Avouac, 2001)<br>(mm/yr) | Basin<br>Area<br>(km <sup>2</sup> ) | $k_{wm}$ |
|------------------------------------|-----------|----------|----------------------------|------------------------|------------------------------------------------------|-------------------------------------|----------|
| KP-090311-01                       | 85.0659   | 27.747   | 0.19                       | 0.02                   | 0.5                                                  | 111.01                              | 6.98     |
| KP-090311-02                       | 84.9673   | 27.807   | 0.21                       | 0.03                   | 0.5                                                  | 12.02                               | 11.55    |
| KP-090311-03                       | 84.9506   | 27.811   | 0.2                        | 0.02                   | 0.5                                                  | 88.18                               | 15.19    |
| KP-090311-04                       | 84.8893   | 27.805   | 0.21                       | 0.03                   | 0.5                                                  | 19.04                               | 8.01     |
| KP-090311-05                       | 84.8336   | 27.803   | 0.36                       | 0.06                   | 1                                                    | 99.36                               | 26.36    |
| KP-090311-06                       | 84.7514   | 27.801   | 0.49                       | 0.08                   | 1.1                                                  | 46.07                               | 28.76    |
| KP-090311-07                       | 84.6938   | 27.805   | 0.24                       | 0.04                   | 1.2                                                  | 55.31                               | 28.81    |
| KP-090311-08                       | 84.6338   | 27.872   | 0.49                       | 0.07                   | 0.5                                                  | 26.24                               | 26.56    |
| KP-160311-09                       | 84.0604   | 28.067   | 0.13                       | 0.01                   | 0.5                                                  | 92.36                               | 11.28    |
| KP-160311-10                       | 84.0781   | 28.013   | 0.14                       | 0.02                   | 0.5                                                  | 97.6                                | 8.94     |
| KP-160311-11                       | 84.2389   | 27.989   | 0.1                        | 0.01                   | 0.5                                                  | 64.68                               | 7.92     |
| KP-160311-12                       | 84.2637   | 28.029   | 0.1                        | 0.01                   | 0.5                                                  | 42.17                               | 14.90    |
| PO-140311-01                       | 83.7725   | 28.311   | 0.63                       | 0.09                   | 4.4                                                  | 87.38                               | 12.72    |
| PO-150311-02                       | 83.7355   | 28.275   | 0.88                       | 0.15                   | 1                                                    | 40.95                               | 9.15     |
| PO-150311-03a                      | 83.7149   | 28.232   | 0.78                       | 0.15                   | 0.8                                                  | 40.65                               | 7.37     |
| PO-150311-05                       | 83.6132   | 28.254   | 0.26                       | 0.04                   | 0.5                                                  | 116.36                              | 12.56    |
| TR-170311-01                       | 85.1358   | 27.921   | 0.52                       | 0.1                    | 0.8                                                  | 53.39                               | 32.17    |
| TR-170311-02                       | 85.1907   | 27.976   | 0.85                       | 0.16                   | 6                                                    | 146.4                               | 27.69    |
| TR-170311-03                       | 85.1756   | 27.983   | 1.33                       | 0.22                   | 4.3                                                  | 85.67                               | 15.43    |
| TR-170311-04                       | 85.1541   | 27.866   | 0.22                       | 0.03                   | 0.5                                                  | 29.29                               | 12.28    |
| EK-180311-01                       | 85.6173   | 27.644   | 0.12                       | 0.01                   | 0.5                                                  | 41.07                               | 34.66    |
| EK-180311-02                       | 85.7347   | 27.677   | 0.12                       | 0.01                   | 0.5                                                  | 41.59                               | 6.11     |
| EK-180311-03                       | 85.8597   | 27.753   | 0.71                       | 0.12                   | 0.6                                                  | 29.67                               | 8.17     |
| EK-180311-04                       | 85.8961   | 27.778   | 1.05                       | 0.27                   | 2.7                                                  | 90.53                               | 11.92    |
| EK-180311-05                       | 85.9152   | 27.882   | 1.81                       | 0.49                   | 7.1                                                  | 67.58                               | 5.37     |
